# Supplementary material
Source: PubMed Central journal article supplement (PMC6398941)
Supplement: NIHMS1519285-supplement-1.pdf [file NIHMS1519285-supplement-1.pdf]

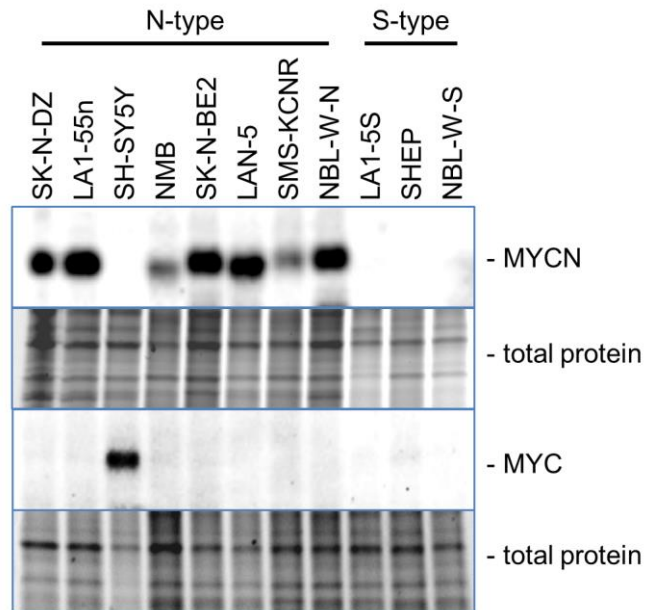

**Supplementary Figure 1. MYCN/MYC expression in N-type and S-type neuroblastoma cell lines.** Tumorigenic, MYCN-amplified N-type cell lines expressed high levels of MYCN. High levels of MYC expression are detected in the MYCN non-amplified, N-type cell line, SH-SY5Y. Low to undetectable levels of MYCN and MYC were observed in the S-type neuroblastoma cells. Total protein is shown as loading control.
