# Supplementary material
Source: PubMed Central journal article supplement (PMC6398941)
Supplement: NIHMS1519285-supplement-2.pdf [file NIHMS1519285-supplement-2.pdf]

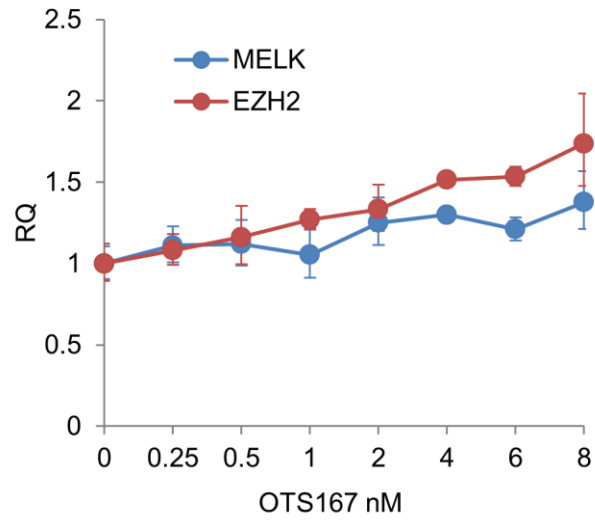

**Supplementary Figure 2. MELK and EZH2 RNA expression.** MELK and EZH2 RNA expression levels in SK-N-BE2 cells were not down-regulated with OTS167 treatment.
