# Supplementary material
Source: PubMed Central journal article supplement (PMC6398941)
Supplement: NIHMS1519285-supplement-3.pdf [file NIHMS1519285-supplement-3.pdf]

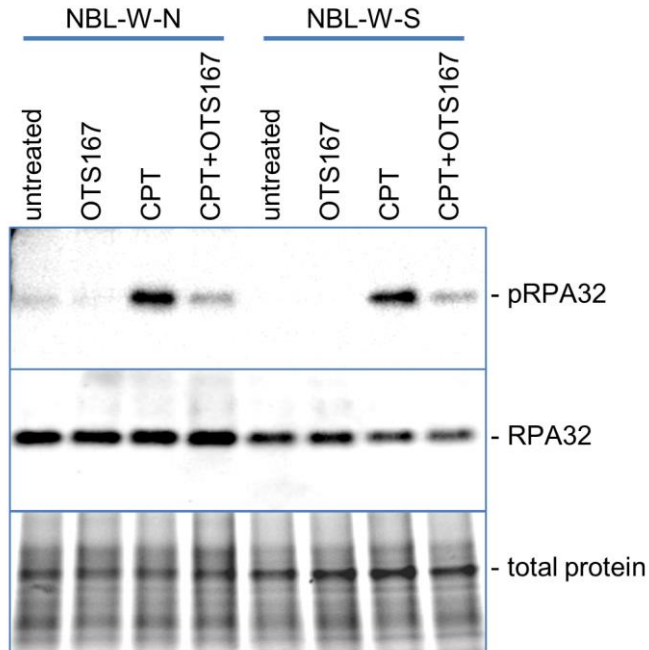

**Supplementary Figure 3. pRPA32 expression in N-type and S-type in untreated neuroblastoma cells and cells treated with OTS167 and CPT alone and in combination.** Treatment of neuroblastoma cells with 10 nM CPT combined with 10 nM OTS167 decreased RPA32 phosphorylation in both N-type NBL-W-N and S-type NBL-W-S cells. Total protein is shown as loading control.
